# Supplementary material for: A new GTF2I-BRAF fusion mediating MAPK pathway activation in pilocytic astrocytoma
Source: PubMed Central journal article supplement (PMC5407815; doi:10.1371/journal.pone.0175638), 2017-04-27
Supplement: pone.0175638.s001.pdf [file pone.0175638.s001.pdf]

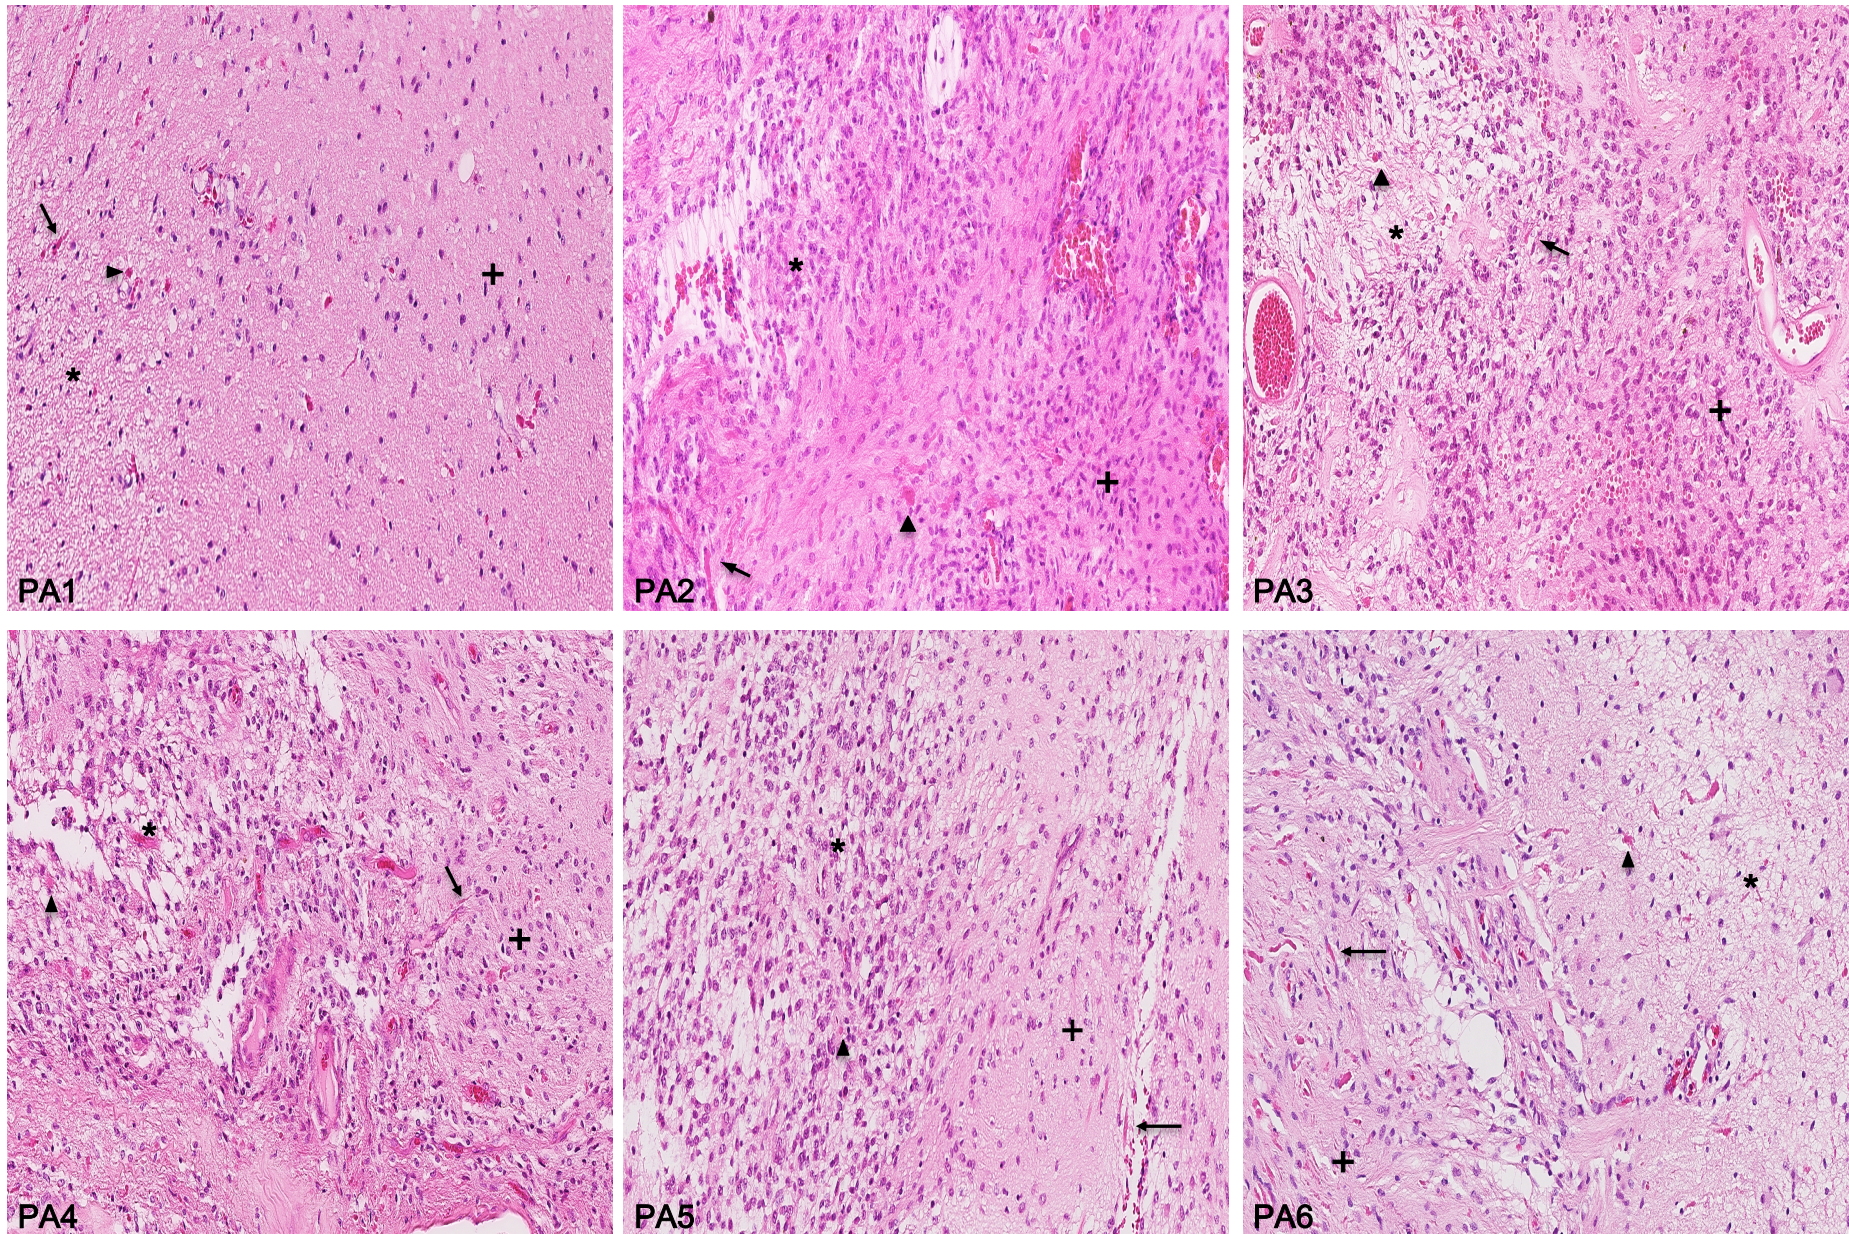

**S1 Fig.** Hematoxylin-Eosin staining of six PA cases. PA histopathological characteristics; compact (+) and loose (\*) areas, Rosenthal fibers (arrow), eosinophilic granular bodies (arrow head). 200x magnification.
